# Supplementary material for: Banp regulates DNA damage response and chromosome segregation during the cell cycle in zebrafish retina
Source: eLife. 2022 Aug 9;11:e74611. doi: 10.7554/eLife.74611 (PMC9363121; doi:10.7554/eLife.74611)
Supplement: Figure 1—figure supplement 4—source data 1. [file elife-74611-fig1-figsupp4-data1.xlsx]

## Sheet: Fig. 1-S4D
banp(wt)-EGFP intensity suring cell division
Time	Intensity
6.92	40.5603
10.38	42.6305
13.84	42.7648
17.3	44.6515
20.76	43.8842
24.22	41.9397
27.68	31.7192
31.14	21.4347
34.6	22.83
38.06	18.0998
41.52	19.6589
44.98	24.0961	cytokinesis
48.44	26.8732
51.9	34.0234
55.36	33.7709
