# Supplementary material for: Banp regulates DNA damage response and chromosome segregation during the cell cycle in zebrafish retina
Source: eLife. 2022 Aug 9;11:e74611. doi: 10.7554/eLife.74611 (PMC9363121; doi:10.7554/eLife.74611)
Supplement: Figure 1—figure supplement 5—source data 1. [file elife-74611-fig1-figsupp5-data1.xlsx]

## Sheet: B
sample	injection	percentage of AO+ cells per retina
wild type	no inj	0.1	0.1	0.1	0	0.1
banprw337	no inj	5.1	3.2	3	3.2	2.5
	banp(wt)-EGFP	0.2	0.5	0.4	0.6	0.8
	EGFP-banp(rw337)	2.3	2.5	3.6	5.2	2.7
