# Supplementary material for: Banp regulates DNA damage response and chromosome segregation during the cell cycle in zebrafish retina
Source: eLife. 2022 Aug 9;11:e74611. doi: 10.7554/eLife.74611 (PMC9363121; doi:10.7554/eLife.74611)
Supplement: Figure 2—figure supplement 1—source data 1. [file elife-74611-fig2-figsupp1-data1.xlsx]

## Sheet: Fig. 2-figure supplement 1C
Percentage in retinal region
	wild type						banprw337
BrdU	5.6	6.5	13.6	9.4	6.8	11.8	4.8	11.4	9.6	6.7	4.2	8.3
ath5:EGFP	18.6	20.6	17.1	17.9	20.5	13.8	13	16.4	13.2	18.6	15.1	13.8

## Sheet: Fig. 2-figure supplment 1F
Number in retinal region
	wild type			banprw337
caspase 3	1	0	0	93	60	65
pH3	23	18	12	56	30	40

## Sheet: Fig. 2-figure supplement 1G
Number of cells
	distance	wildtype pH3 (n=23)	wildtype Caspase3 (n=1)	mutant pH3 (n=56)	mutant Caspase3 (n=93)
apical	0	0	0	0	0
	0.1	9	0	31	1
	0.2	13	0	23	13
	0.3	1	0	2	32
	0.4	0	0	0	25
	0.5	0	1	0	13
	0.6	0	0	0	7
basal	0.7	0	0	0	3
	0.8	0	0	0	0
	0.9	0	0	0	0
lens	1	0	0	0	0

## Sheet: Fig. 2-figure supplement 1I
Percentage in retinal region
	wild type							banprw337
ath5:EGFP+ cells/total retinal cell	17.2	13.5	11.8	15.8	17	21	20.4	13.1	15.3	6.4	4.6	6.4	5.5	4.5
ath5:EGFP+; caspase+ cells/ total casepase+ cells	0	0	0	0	0	0	0	25	30	0	0	0	11.1111	0

## Sheet: Fig. 2-figure supplement 1K
Percentage in retinal region
	wild type							banprw337
HuC/D+/total retinal cell	0.5	1	3.8	1.1	0.6	2.2	0.9	0.1	0.4	0.4	0.9	0.7	0.5
HuC/D+; caspase+ cells/ total casepase+ cells	0	0	0	0	0	0	0	0	0	0	0	0	0
