# Supplementary material for: Banp regulates DNA damage response and chromosome segregation during the cell cycle in zebrafish retina
Source: eLife. 2022 Aug 9;11:e74611. doi: 10.7554/eLife.74611 (PMC9363121; doi:10.7554/eLife.74611)
Supplement: Figure 2—source data 1. [file elife-74611-fig2-data1.xlsx]

## Sheet: Fig. 2C
sample	stage	TUNEL cells per retina
wild type	24 hpf	29	6	9
	53 hpf	1	5	5
	77 hpf	2	4	5
	101 hpf	1	0	1
banprw337	24 hpf	4	33	1
	53 hpf	275	208	166
	77 hpf	195	168	275
	101 hpf	140	274	217

## Sheet: Fig. 2D
sample	stage	pH3+ cells per retina
wild type	24 hpf	17	14	8
	53 hpf	10	21	11
	77 hpf	1	0	1
	101 hpf	1	2	0
banprw337	24 hpf	13	19	7
	53 hpf	71	118	93
	77 hpf	21	18	10
	101 hpf	14	8	18
