# Supplementary material for: Banp regulates DNA damage response and chromosome segregation during the cell cycle in zebrafish retina
Source: eLife. 2022 Aug 9;11:e74611. doi: 10.7554/eLife.74611 (PMC9363121; doi:10.7554/eLife.74611)
Supplement: Figure 3—source data 1. [file elife-74611-fig3-data1.xlsx]

## Sheet: Fig. 3C
sample	gene	qRT-PCR (fold change)
wild type	bbc3 (puma)	0.897194	0.991008	1.1247
	ccng1	0.750494	1.30107	1.02413
	mdm2	0.95926	1.02876	1.01333
	cdkn1a (p21)	1.28961	0.727499	1.06588
banprw337	bbc3 (puma)	5.03385	6.78219	7.45842
	ccng1	9.40141	5.57666	3.89247
	mdm2	5.58796	5.47315	6.38778
	cdkn1a (p21)	3.61712	3.47738	4.2931

## Sheet: Fig. 3E
wild type					banprw337
	p53	b-act	p53/b-act*100			p53	b-act	p53/b-act*100
WT1	74948	1248339	6.00382		Mut1	2051670	901353	227.621
WT2	96200	1133730	8.48527		Mut2	1369661	1134294	120.75
WT3	258797	1168703	22.1439		Mut3	2272403	2792453	81.3766
average	143315	1.18359e+06	12.211		average	1.89791e+06	1.60937e+06	143.249
SD	100573	58737	8.69119		SD	470603	1.03118e+06	75.6738

## Sheet: Fig. 3F
sample	gene	qRT-PCR
wild type	atm	1.01095	0.821945	1.20344
	atr	1.04304	0.77074	1.24392
banprw337	atm	1.52819	1.94184	1.4145
	atr	1.65056	1.37436	1.55851

## Sheet: Fig. 3H
sample	stage	MO	Number of TUNEL+ cell per section
wild type	48 hpf	STD MO	0	0	0
		tp53 MO	3	1	0	0
	72 hpf	STD MO	1	1	1	1
		tp53 MO	6	4	5
banprw337	48 hpf	STD MO	175	205	144
		tp53 MO	0	1	1	0
	72 hpf	STD MO	204	136	228
		tp53 MO	34	22	28
