# Supplementary material for: Banp regulates DNA damage response and chromosome segregation during the cell cycle in zebrafish retina
Source: eLife. 2022 Aug 9;11:e74611. doi: 10.7554/eLife.74611 (PMC9363121; doi:10.7554/eLife.74611)
Supplement: Figure 4—figure supplement 1—source data 1. [file elife-74611-fig4-figsupp1-data1.xlsx]

## Sheet: Fig. 4-figure supplement 1B
Number of gamma-H2AX cells per retina
STD MO	banp MO
0	93
1	87
2	110
2	86
0	97

## Sheet: Fig. 4-figure supplement 1D
The fraction of gamma-H2AX cells in total retinal area
wild-type	banprw337
0	0.4
0	0.4
0	0.3
0	0.4
0	1.6
0	0.3

## Sheet: Fig. 4-figure supplement 1F
Fraction of BrdU+ cells in banprw337 mutants
total retinal cells	g-H2AX+ cells
4.8	25
11.4	50
9.6	33.3333
6.7	25
4.2	31.25
8.3	33.3333

## Sheet: Fig. 4-figure supplement 1H
Fraction of ath5:EGFP+ cells in banprw337 mutants
total retinal cells	g-H2AX+ cells
13	0
16.4	75
13.2	25
18.6	20
15.1	12.5
13.8	66.6667

## Sheet: Fig. 4-figure supplement 1J
Fraction of pH3+ cells in banprw337 mutants
total retinal cells	g-H2AX+ cells
1.8488	0
1.548	0
2.22288	1.07875
2.08174	2.77614
1.68917	0
2.11011	3.21667
1.83062	6.859
3.22267	0
3.13186	0
2.60383	0
