# Supplementary material for: Banp regulates DNA damage response and chromosome segregation during the cell cycle in zebrafish retina
Source: eLife. 2022 Aug 9;11:e74611. doi: 10.7554/eLife.74611 (PMC9363121; doi:10.7554/eLife.74611)
Supplement: Figure 4—source data 1. [file elife-74611-fig4-data1.xlsx]

## Sheet: Fig. 4A
gene	FL tp53		∆113tp53
sample	wild type	banprw337	wild type	banprw337
qRT-PCR (fold change relative to EF1alpha)	0.849163	0.458562	1.10031	29.2676
	1.14414	0.720174	1.02076	35.7639
	1.02927	1.3244	0.890352	53.3181

## Sheet: Fig. 4D
Number of TUNEL+ cells
sample	STD MO				tp53 MO				∆113tp53 MO
wild type	0	0	0		3	1	0	0	4	2	10
banprw337	175	205	144		0	1	1	0	69	47	58

## Sheet: Fig. 4E
Number of pH3+ cells
sample	STD MO								tp53 MO								∆113tp53 MO
wild type	188	135	143	158	117	139			132	133	148	118	128	120	115	128	157	107	149	140	130	144	127	103
banprw337	388	299	457	300	439				196	266	177	373	295	334	240	218	290	237	300	379	293	324

## Sheet: Fig. 4F
Number of gamma-H2X+ cells
sample	STD MO								tp53 MO								∆113tp53 MO
wild type	1	0	0	0	0	0			0	1	1	0	2	0	0	0	0	0	0	1	1	0	2	1
banprw337	78	202	170	75	79				29	57	39	81	66	60	59	56	105	84	59	82	91	91
