# Supplementary material for: Banp regulates DNA damage response and chromosome segregation during the cell cycle in zebrafish retina
Source: eLife. 2022 Aug 9;11:e74611. doi: 10.7554/eLife.74611 (PMC9363121; doi:10.7554/eLife.74611)
Supplement: Figure 5—source data 1. [file elife-74611-fig5-data1.xlsx]

## Sheet: Fig. 5A
sample	ncapg qRT-PCR (fold change relative to EF1alpha)
wild type	0.871241	1.06982	1.07288
banprw337	0.473189	0.165654	0.437792
STD MO	1.17431	0.894873	1.10825
banp MO	0.405046	0.32702	0.394746

## Sheet: Fig. 5C
sample	cenpt qRT-PCR (fold change relative to EF1alpha)
wild type	0.966198	0.745555	1.38821
banprw337	0.107031	0.0341773	0.0862776
STD MO	1.0931	1.01055	1.14298
banp MO	0.753982	0.493768	0.488429

## Sheet: Fig. 5F
Time of mitosis length
banp 5misMO	banp MO
25.2	79.4833
18.9	59.9833
25.2	49.5
25.2	39
21.42	26.85
23.94	32.6333
16.38	40.2667
26.85	49.5667
15.4833	33
17.55	33
13.4333	53
17.55	55
21.6833	57
26.85	29.29
25.8167	22.4
20.65	48.48
20.65	76.76
35.25	70.7
33.05	45.45
25.8167	32.32
14.45	40.4
24.7833	68.15
33.05	59.9
20.6667	100.167
	58.8667
	51.6333
	35.1
	61.95
	54.7333
	36.15
	43.3667
	39.25
	40.2833

## Sheet: Fig. 5H
sample	Normal mitosis				abnormal mitosis
wild type	96	92.8571	85.7143	100	4	7.14286	14.2857	0
banprw337	23.0769	10.7143	2.43902	33.3333	76.9231	89.2857	97.561	66.6667
