# Supplementary material for: Banp regulates DNA damage response and chromosome segregation during the cell cycle in zebrafish retina
Source: eLife. 2022 Aug 9;11:e74611. doi: 10.7554/eLife.74611 (PMC9363121; doi:10.7554/eLife.74611)
Supplement: Figure 6—figure supplement 2—source data 1. [file elife-74611-fig6-figsupp2-data1.xlsx]

## Sheet: wrnip1
sample	wrnip1 qRT-PCR (fold change relative to EF1alpha)
wild type	0.737428	1.08696	1.24758
banprw337	0.254143	0.0602309	0.40925
STD MO	1.55503	0.951585	1.01303	0.667099
banp MO	0.362922	0.199508	0.173667	0.178826
